# Supplementary material for: Factors related to the relative survival of patients with diffuse large B-cell lymphoma in a population-based study in France: does socio-economic status have a role?
Source: PubMed Central journal article supplement — Haematologica. 2016 Nov 29;102(3):584–92. doi: 10.3324/haematol.2016.152918 (PMC5394966; doi:10.3324/haematol.2016.152918), 2017-03
Supplement: 2016_152918-Disclosures_and_Contributions.pdf [file 2016_152918-Disclosures_and_Contributions.pdf]

Haematologica  
HAEMATOL/2016/152918  
Version 3

Factors related to diffuse large B-cell lymphoma relative survival in a population-based study in France: is there a role of socio-economic status?

Sandra Le Guyader-Peyrou, Sebastien Orazio, Olivier Dejardin, Marc Maynadie, Xavier Troussard, and Alain Monnereau

Disclosures: This work was supported by French "Institut National du Cancer" (INCa).

Conflict of interest: Maynadié M: scientific expert for Roche and Janssen The others authors do not have any conflict of interest to declare.

Contributions: Authors contributions: Conception/design: Le Guyader-Peyrou S/ Monnereau A. Collection and/or assembly of data: All authors Data analysis and interpretation: All authors Manuscript writing: Le Guyader-Peyrou S/ Monnereau A. Revised and final approval version of manuscript: All authors.
